# Supplementary material
Source: Springer Nature journal article supplement (https://www.springermedizin.de/resource/supplementary/12885_2013_4377_MOESM1_ESM.pdf/9466024)

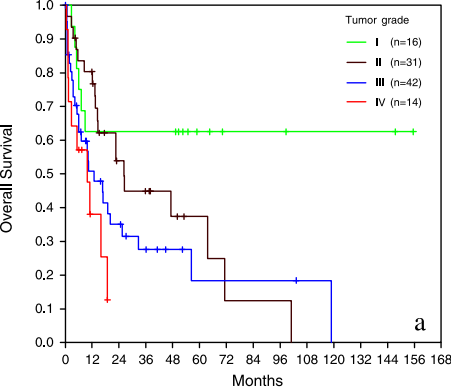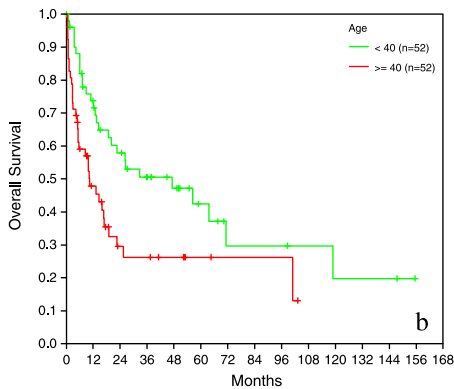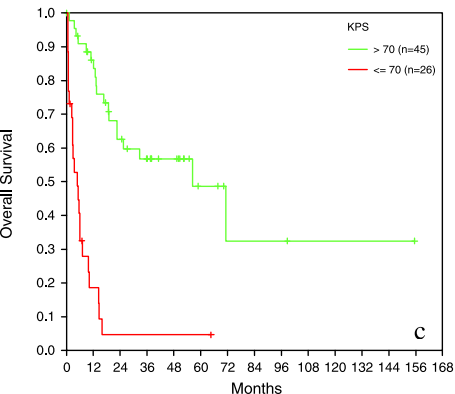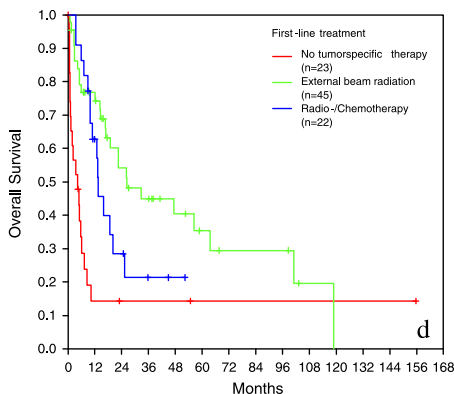

Supplement: MOESM1 [file 9466024]
